# Supplementary material for: CX3CL1, a chemokine finely tuned to adhesion: critical roles of the stalk glycosylation and the membrane domain
Source: PubMed Central journal article supplement (PMC4265755; doi:10.1242/bio.20149845), 2014-11-13
Supplement: supp_bio.20149845_bio.20149845-s1.pdf [file supp_bio.20149845_bio.20149845-s1.pdf]

## Supplementary Material

Mariano A. Ostuni et al. doi: 10.1242/bio.20149845

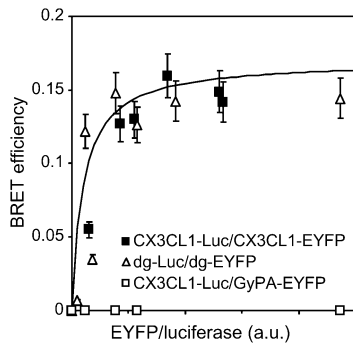

**Fig. S1. dgCX3CL1 aggregation determined by BRET.** COS7 cells were transiently transfected with luciferase-coupled and EYFP-coupled chimeras of native CX3CL1 or dgCX3CL1 at different EYFP/luciferase ratios. The control of unspecific BRET was performed with COS7 cells transiently transfected with EYFP-coupled glycophorin A (GyPA-EYFP) and luciferase-coupled CX3CL1. The BRET experiments were performed as previously described (Hermand et al., 2008).

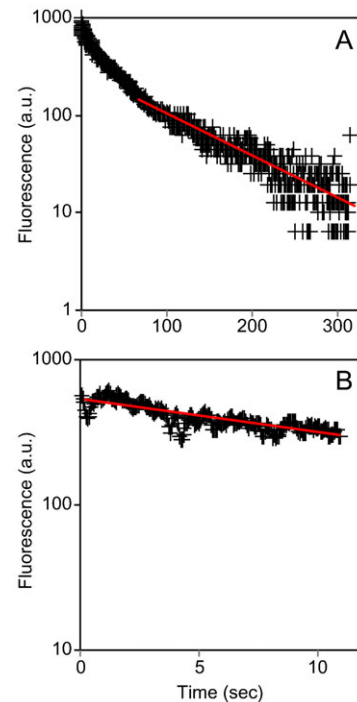

**Fig. S3. Monodisperse character of the fluorescence recovery of CX3CL1-EYFP in COS cells as analyzed by FRAPP.** (A) Typical fluorescence recovery curve by FRAPP using an interfringe of 4.4  $\mu\text{m}$ . The Y-axis shows the difference in intensity between the bright and dark fringes,  $F(t)$ . This difference reaches zero when the fluorescence is fully recovered. The long time scale behaves as a single exponential and corresponds to the recovery of the slow CX3CL1 population. The exponential fit ( $F_{\text{slow}}(t)$ ) gives a characteristic time corresponding to a diffusion coefficient of  $D_{\text{slow}}=0.005 \mu\text{m}^2/\text{s}$ . (B) Plot of the contribution of the short timescale behavior  $F(t)-F_{\text{slow}}(t)$ , which also appears to be a single exponential with a characteristic time that corresponds to a diffusion coefficient of  $D_{\text{fast}}=0.025 \mu\text{m}^2/\text{s}$ . In this example, 67% of the CX3CL1 molecules in the population are diffusing in the fast regime. The pure exponential behavior indicates that the diffusive objects (bundles of CX3CL1) are essentially monodisperse in size.

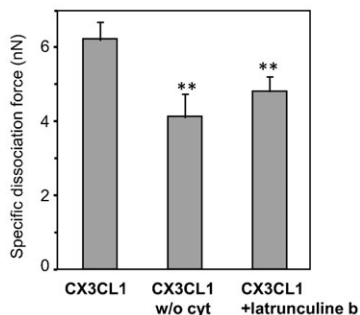

**Fig. S2. Role of cytosolic domain in adhesion force.** Dissociation force between CX3CR1 stable CHO clone and COS7 cells transiently transfected with CX3CL1-EYFP or with CX3CL1-EYFP w/o cyt. The cells expressing CX3CL1-EYFP were pretreated or not with 500 nM Latrunculin B for 60 min before the experiments. \*\*  $p < 0.01$  compared with native CX3CL1-EYFP.

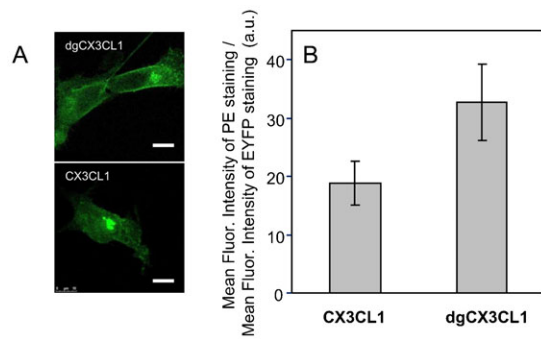

**Fig. S4. Membrane localization of CX3CL1 and dgCX3CL1 expressed in CHOIdID cells under low serum conditions (0.1% FCS).** (A) Representative images of CHOIdID cell expressing dgCX3CL1 (top panel) and native CX3CL1 (bottom panel). Images were taken with a Leica SP5 confocal microscope (63× dry objective). The bars represent 10 μm. (B) Flow cytometry signal ratio between anti-CX3CL1 PE-conjugated antibody fluorescence and EYFP fluorescence. CHOIdID cells expressing dgCX3CL1-EYFP or native CX3CL1-EYFP were cultured under low serum condition and labelled using anti-CX3CL1 PE-conjugated antibody. Fluorescence signal was analyzed by flow cytometry.

**Table S1. Characteristics of the lateral diffusion of CX3CL1 and CX3CR1 in various cell types measured through the FRAPP technique**

| Cell type                             | HEK293                   | HEK293                   | HEK293 TIRF              | HEK293 TIRF              |
|---------------------------------------|--------------------------|--------------------------|--------------------------|--------------------------|
| Transfection and fluorescent staining | Stable<br>CX3CL1<br>EYFP | Stable<br>CX3CR1<br>EYFP | Stable<br>CX3CL1<br>EYFP | Stable<br>CX3CR1<br>EYFP |
| D (μm <sup>2</sup> s <sup>-1</sup> )  | 0.0178±0.0033            | 0.0550±0.0076            | 0.0255±0.0028            | 0.0549±0.0035            |
